# Supplementary material for: Exploring potential anti-inflammatory effects of medicinal cannabis
Source: Springer Nature journal article supplement (doi:10.1007/s00520-023-08069-8), 2023-10-14
Supplement: MOESM1 [file 26527604]

## **Exploring potential anti-inflammatory effects of medicinal cannabis**

Taylan Gurgenci<sup>1,2\*</sup>, Gregor Kijanka<sup>3\*</sup>, Ristan Greer<sup>2,4</sup>, Georgie Huggett<sup>1</sup>, Phillip Good<sup>1,2,5</sup>, Md Moniruzzaman<sup>2,6</sup>, Janet Hardy<sup>1,2</sup>

\*joint first authors

<sup>1</sup>Department Palliative and Supportive Care, Mater Health Services, South Brisbane, Queensland, Australia

<sup>2</sup>Mater Research Institute - University of Queensland, Brisbane, Queensland, Australia

<sup>3</sup>Queensland Micro- and Nanotechnology Centre, Griffith University

<sup>4</sup>Torus Research, Brisbane, Queensland, Australia

<sup>5</sup>Department of Palliative Care, St Vincent's Private Hospital Brisbane, Brisbane, Queensland, Australia

<sup>6</sup>School of Pharmacy, The University of Queensland, Brisbane, Australia

**Supplementary Figure 1.** Line graphs for CRP from baseline to day 28 by treatment arm and corticosteroid exposure.

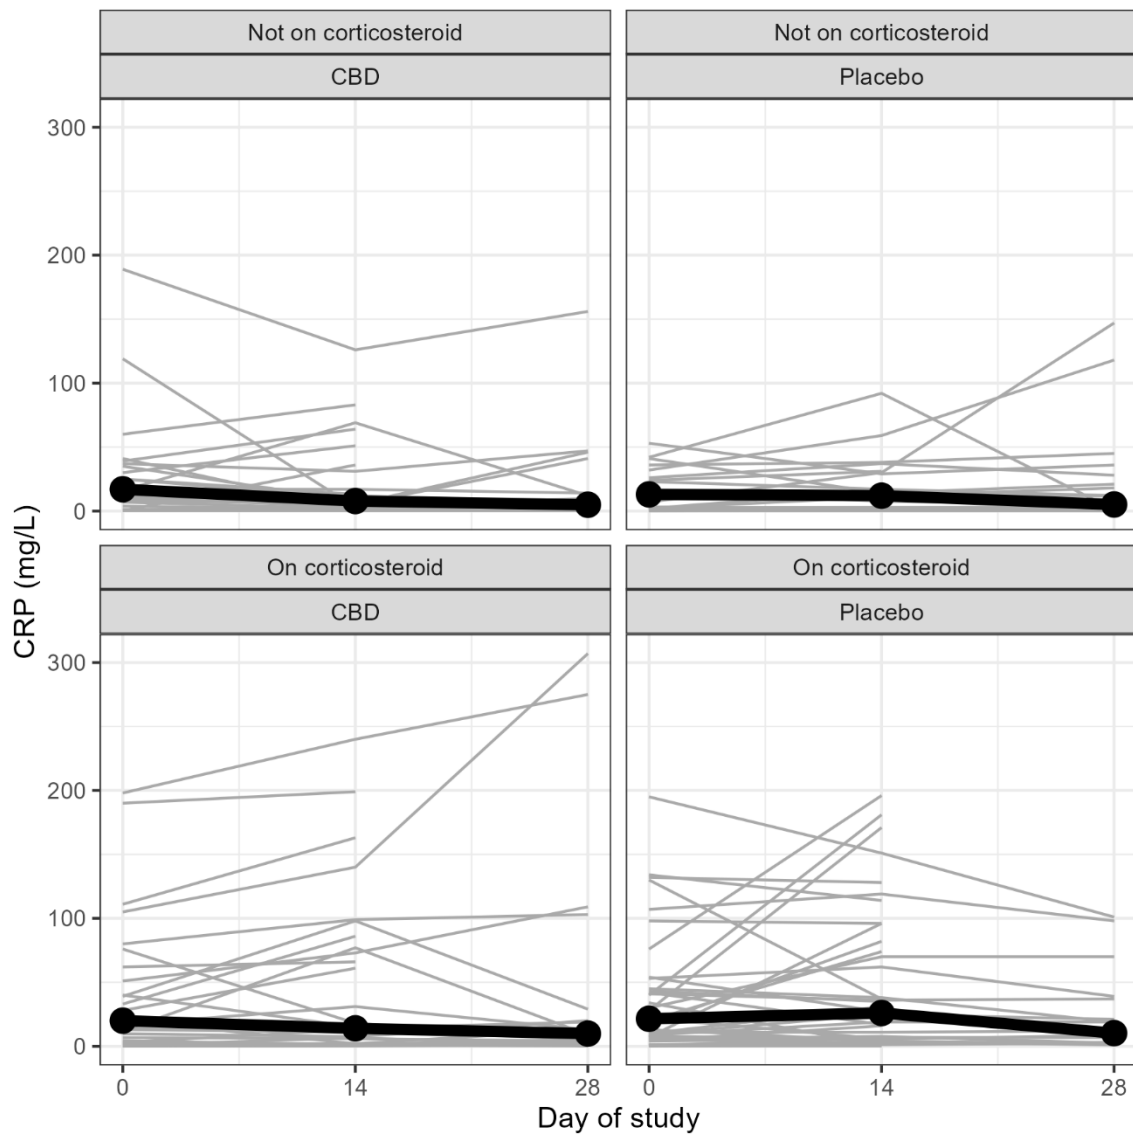

Thick lines indicate the median CRP and grey lines the values for each individual participant.

**Supplementary table Table 1. CRP (median (range)), mg/L at baseline, day 14 and day 28 by treatment arm and corticosteroid exposure\*.**

| time point                       | CRP (mg/L), CBD group  | CRP (mg/L), Placebo group | p-value |
|----------------------------------|------------------------|---------------------------|---------|
| baseline: not on corticosteroids | 17.0 (0.3 – 189), n=29 | 13.0 (0.3 – 53), n=24     | 0.21    |
| baseline: on corticosteroids     | 20.0 (0.3 – 198), n=39 | 21.5 (0.3 – 254), n=46    | 0.74    |
| day 14: not on corticosteroids   | 7.8 (0.4 – 126), n=25  | 12.0 (0.3 – 92), n=23     | 0.75    |
| day 14: on corticosteroids       | 14.0 (0.3 – 240), n=29 | 26.0 (0.3 – 196), n=38    | 0.65    |
| day 28: not on corticosteroids   | 4.9 (0.4 – 156), n=17  | 5.1 (0.3 – 147), n=21     | 0.68    |
| day 28: on corticosteroids       | 9.9 (0.3 – 307), n=25  | 10.3 (1.0 – 101), n=18    | 0.91    |

\*Excludes those with missing CRC data

**Supplementary Table 2. Participant characteristics (MedCan-Inflam)**

|                         | CBD<br>n=15         | Placebo<br>n=17     |
|-------------------------|---------------------|---------------------|
| Age (median, IQR)       | 69.0 (66.5 to 79.5) | 73.0 (62.0 to 79.0) |
| Gender M/F (%M)         | 10/5 (66.7%)        | 6/11 (35.3%)        |
| Primary Cancer          |                     |                     |
| Brain                   | 1 (6.7)             | 0 (0.0)             |
| Breast                  | 0 (0.0)             | 5 (29.4)            |
| Colorectal              | 2 (13.3)            | 3 (17.6)            |
| Gynecological           | 1 (6.7)             | 2 (11.8)            |
| Haematological          | 1 (6.7)             | 0 (0.0)             |
| LiverHCC                | 1 (6.7)             | 0 (0.0)             |
| Lung                    | 2 (13.3)            | 0 (0.0)             |
| Lung,Colorectal         | 1 (6.7)             | 0 (0.0)             |
| Pancreas                | 0 (0.0)             | 1 (5.9)             |
| Prostate                | 5 (33.3)            | 5 (29.4)            |
| Prostate,Haematological | 0 (0.0)             | 1 (5.9)             |
| Urothelial              | 1 (6.7)             | 0 (0.0)             |
